# Supplementary material
Source: PubMed Central journal article supplement (PMC6801106)
Supplement: NIHMS1005190-supplement-Suppl.pdf [file NIHMS1005190-supplement-Suppl.pdf]

# CHEMNANOMAT

CHEMISTRY OF NANOMATERIALS FOR ENERGY, BIOLOGY AND MORE

## Supporting Information

### **Biomimetic Crystallization of $\text{MnFe}_2\text{O}_4$ Mediated by Peptide-Catalyzed Esterification at Low Temperature**

Yoshiaki Maeda,<sup>[a]</sup> Zengyan Wei,<sup>[a]</sup> Yasuhiro Ikezoe,<sup>[a]</sup> Edmund Tam,<sup>[a]</sup> and Hiroshi Matsui\*<sup>[a, b]</sup>

cnma\_201500181\_sm\_miscellaneous\_information.pdf

## Electron diffraction

Detailed indexation of the selected area electron diffraction pattern in Figure 1-a-inset in the main text is shown in Supplementary Figure S1.

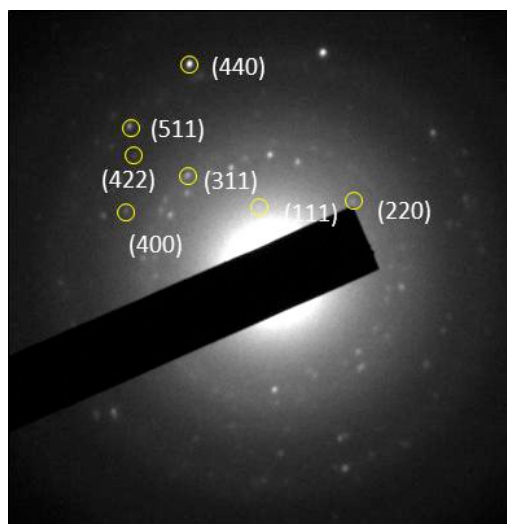

**Supplementary Figure S1.** Detailed indexations of the diffraction patterns in Figure 1-a, inset in the main text.

## Gas chromatograph-mass spectroscopy (GC-MS)

After 11-day incubation of the CP4 and Mn/Fe precursor solution, the reaction mixture was centrifuged to precipitate the  $\text{MnFe}_2\text{O}_4$ /peptide aggregation and supernatant was transferred to new tube. Twice volume of decane was added and the tube was vigorously stirred, centrifuged (18,000 $\times$ g, 15 min) to separate decane and methanol phases, and then decane phase was collected. In this purification step, polar species (acetate ion and Mn/Fe ion) are estimated to remain in methanol/benzyl alcohol phase, and non-polar methyl acetate is expected to move to decane phase. As prepared decane fraction was applied to GC-MS (Varian 4000 GC/MS). GC conditions were set as the following, column: Varian factor four capillary column (30 m x 0.25 mm x 0.25  $\mu\text{m}$ ), carrier gas: helium, oven temperature: 40°C, Column Flow: 1.2 mL/min, Injector temperature: 250°C, Split Ratio - 100:1. The detector on GC was activated from 1.25~1.75 min after the sample injection to prevent the detection of large peaks from decane and its impurities. Characteristic peak was detected at 1.55 min as retention time (Figure 2-(a) in the main text), which matched with standard methyl acetate (Sigma-Aldrich) peak (Figure 2-(b)). MS analysis further confirmed the detection of methyl acetate, supporting the  $\text{MnFe}_2\text{O}_4$  synthesis *via* ester-elimination pathway.
